# Supplementary material for: Accumulation of a Bioactive Benzoisochromanequinone Compound Kalafungin by a Wild Type Antitumor-Medermycin-Producing Streptomycete Strain
Source: PLoS One. 2015 Feb 19;10(2):e0117690. doi: 10.1371/journal.pone.0117690 (PMC4335000; doi:10.1371/journal.pone.0117690)
Supplement: S1 File — (DOC) [file pone.0117690.s001.doc]

***Supplementary Data***

**Title**: Accumulation of a bioactive benzoisochromanequinone compound kalafungin by a wild type antitumor-medermycin-producing streptomycete strain

**Authors**: Jin Lüa，b, Qiang Heb, Luyao Huangb, Xiaofeng Caib, Wenwen Guob, Jing Hec, Lili Zhangd, Aiying Lia, b,#

**Affiliations**:

aState Key Laboratory for Microbial Technology, Shandong University-Helmholtz Joint Institute of Biotechnology and School of Life Sciences, Shandong University, Jinan 250100, China

bSchool of Life Sciences, Central China Normal University, Wuhan 430079, Hubei, China

cState Key Laboratory of Agricultural Microbiology, Huazhong Agricultural University, Wuhan 430070, Hubei, China

dXinjiang Production & Construction Corps Key Laboratory of Protection and Utilization of Biological Resources in Tarim Basin, Tarim University, Alar 843300, Xinjiang, China

#Corresponding author: Aiying Li, Email: [ayli@sdu.edu.cn](mailto:ayli@sdu.edu.cn)
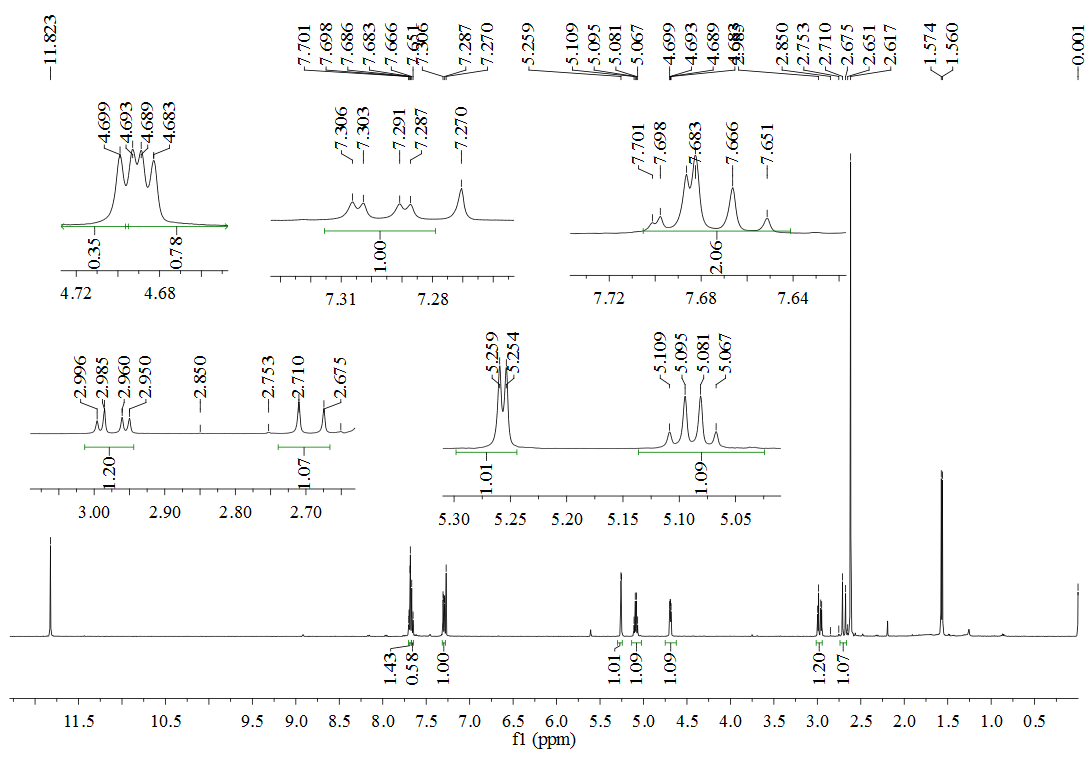


**Figure S1 1H NMR spectrum of compound X (500 Hz, CDCl3).** Expected peaks for each hydrogen in compound X were detected. Two extra peaks (2.62 ppm and 7.27 ppm) were collected as well, representing chemical shifts of DMSO (residual solvent used during compound purification) and CDCl3 (deuterated NMR solvent) respectively.


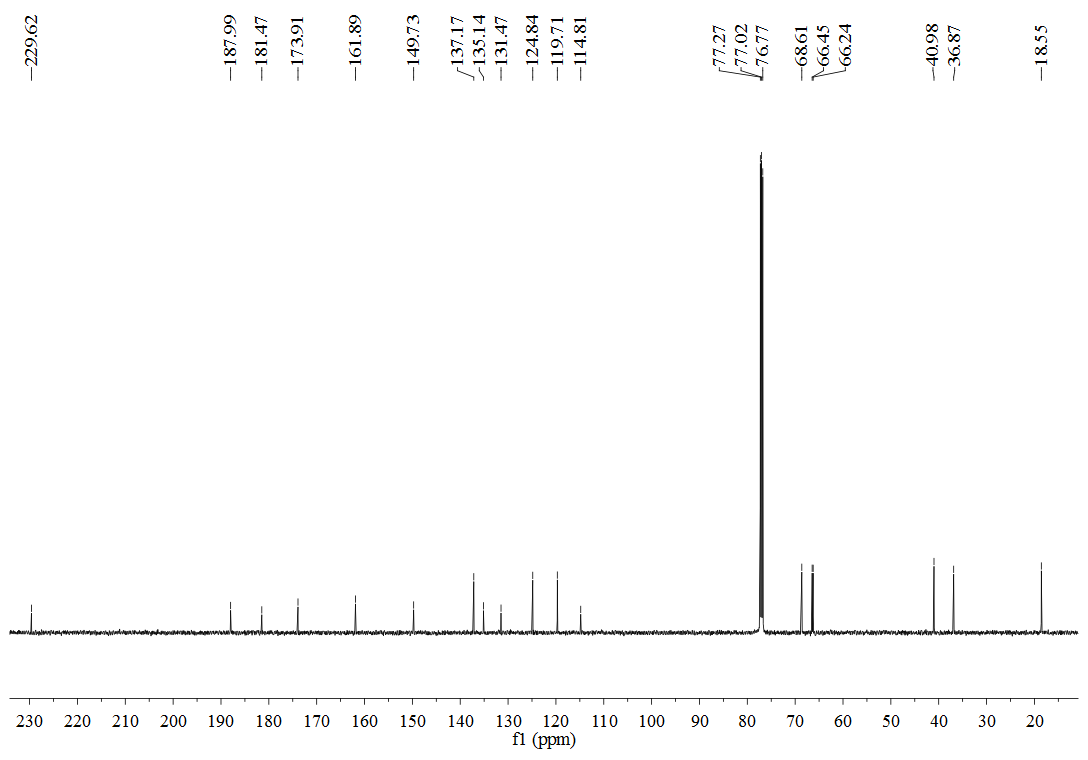


**Figure S2 13C NMR spectrum of compound X** **(125 Hz, CDCl3).** Expected peaks representing chemical shift of each carbon in compound X were collected, besides two extra peaks (40.98 and 76.77 ppm for the residual solvent DMSO and deuterated solvent CDCl3 respectively).
